# Supplementary material
Source: Springer Nature journal article supplement (https://www.springermedizin.de/resource/supplementary/12877_2014_1067_MOESM1_ESM.pdf/9440754)

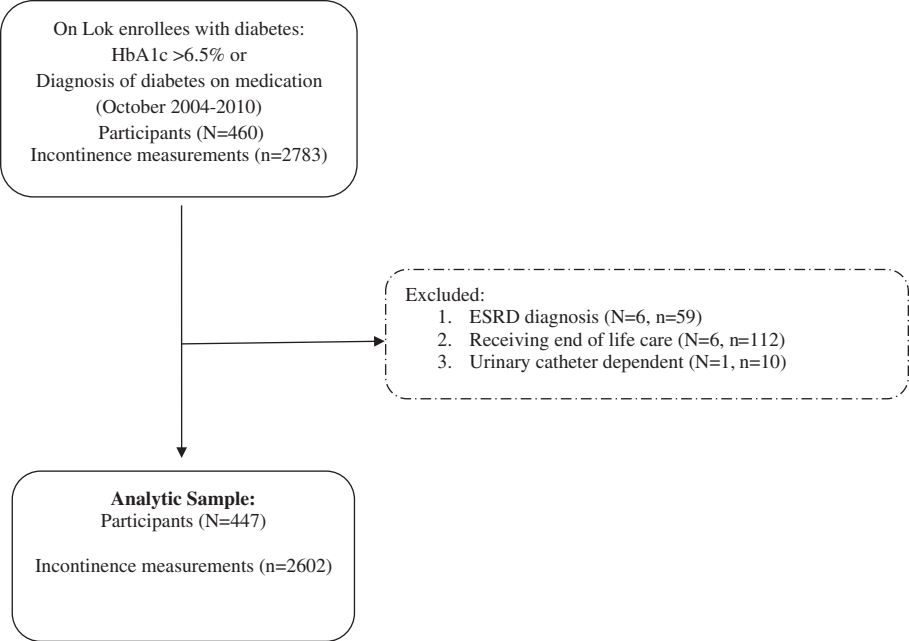

N = number of On Lok enrollees

n = number of urinary incontinence measurements

Supplement: MOESM1 [file 9440754]
